# Supplementary material for: Performance enhancement of perovskite solar cells using a La-doped BaSnO3 electron transport layer
Source: Royal Society of Chemistry journal article supplement (doi:10.1039/c6ta09689a), 2017-01-01
Supplement: c6ta09689a1.pdf [file c6ta09689a1.pdf]

## Supplementary Information

### Performance Enhancement of Perovskite Solar Cells using a La doped BaSnO<sub>3</sub> Electron Transport Layer

Liangzheng Zhu,<sup>ab</sup> Jiajiu Ye,<sup>ab</sup> Xuhui Zhang,<sup>ab</sup> Haiying Zheng,<sup>ab</sup> Guozhen Liu,<sup>ab</sup> Xu Pan,<sup>\*a</sup> and Songyuan Dai<sup>\*c</sup>

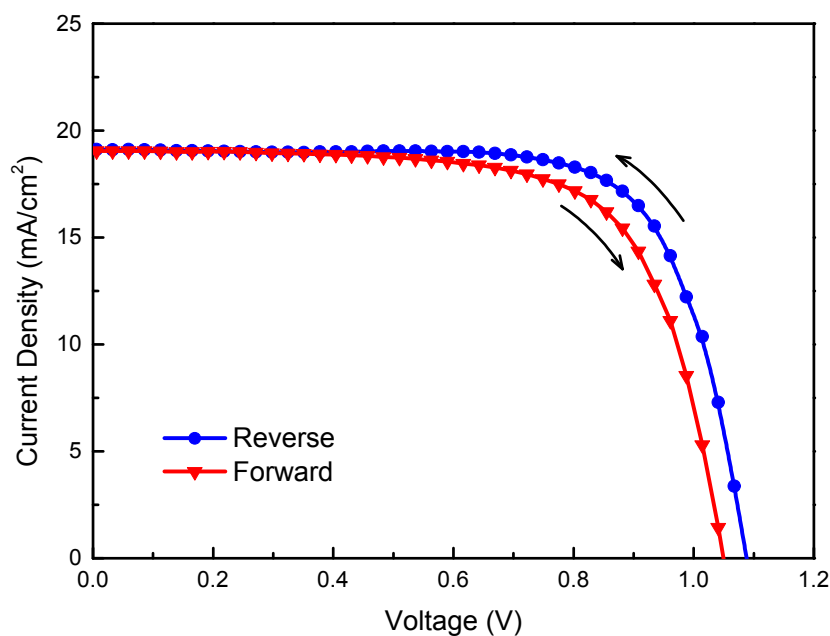

**Fig. S1**  $J$ - $V$  curves of mp-LBSO based device measured by forward scan (from short circuit to open circuit) and reverse scan (from open circuit to short circuit) under AM 1.5 illumination, 100 ms dwell time.

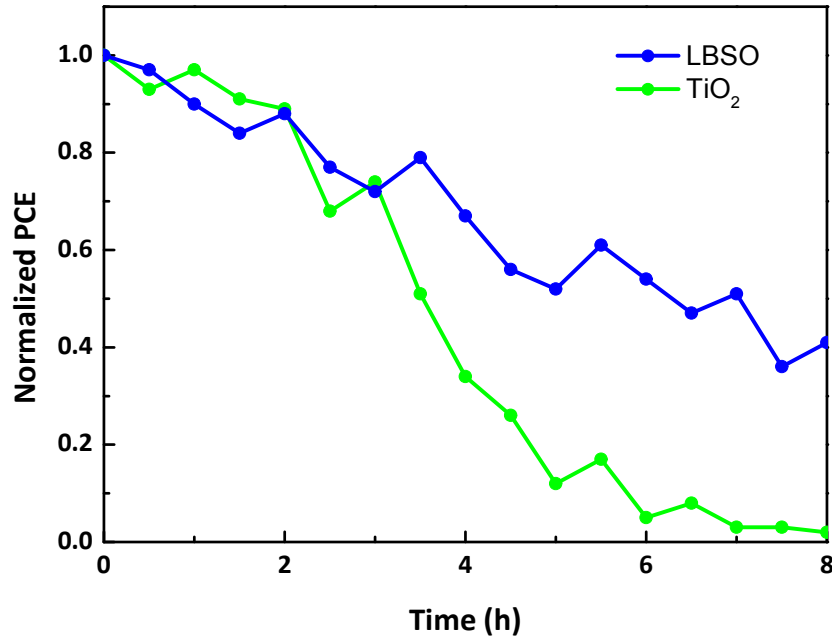

**Fig. S2** Stability test of PCE degradation of TiO<sub>2</sub> and LBSO based unsealed devices under continuous light illumination (AM1.5) for 8 h in ambient with a relative humidity of about 30% and a temperature between 20 and 30 °C.

**Table S1** Detailed device parameters for the comparison between mp-LBSO, mp-BSO and mp-TiO<sub>2</sub> based PSCs.

| Sample No. | Mesoporous layer | PCE (%) | $J_{sc}$ (mA cm <sup>-2</sup> ) | $V_{oc}$ (V) | FF    |
|------------|------------------|---------|---------------------------------|--------------|-------|
| 1          | LBSO             | 14.6    | 18.7                            | 1.08         | 0.726 |
| 2          | LBSO             | 14.3    | 18.8                            | 1.03         | 0.740 |
| 3          | LBSO             | 13.5    | 19.9                            | 1.00         | 0.679 |
| 4          | LBSO             | 14.9    | 19.7                            | 1.07         | 0.707 |
| 5          | LBSO             | 14.7    | 20.1                            | 1.03         | 0.709 |
| 6          | LBSO             | 15.0    | 20.0                            | 1.05         | 0.718 |
| 7          | LBSO             | 14.0    | 19.7                            | 1.01         | 0.703 |
| 8          | LBSO             | 14.3    | 19.8                            | 1.02         | 0.707 |
| 9          | BSO              | 12.7    | 18.9                            | 1.03         | 0.651 |
| 10         | BSO              | 13.4    | 18.9                            | 1.04         | 0.686 |
| 11         | BSO              | 13.1    | 18.7                            | 1.04         | 0.673 |
| 12         | BSO              | 12.2    | 18.3                            | 0.99         | 0.671 |
| 13         | BSO              | 13.4    | 18.4                            | 1.02         | 0.714 |
| 14         | BSO              | 13.1    | 18.7                            | 0.98         | 0.715 |
| 15         | BSO              | 12.6    | 18.8                            | 1.02         | 0.656 |
| 16         | BSO              | 12.9    | 18.7                            | 1.01         | 0.686 |
| 17         | TiO <sub>2</sub> | 14.7    | 19.4                            | 1.06         | 0.717 |
| 18         | TiO <sub>2</sub> | 14.9    | 19.8                            | 1.07         | 0.705 |
| 19         | TiO <sub>2</sub> | 14.5    | 18.7                            | 1.06         | 0.735 |
| 20         | TiO <sub>2</sub> | 16.2    | 18.9                            | 1.09         | 0.787 |

|           |                  |      |      |      |       |
|-----------|------------------|------|------|------|-------|
| <b>21</b> | TiO <sub>2</sub> | 15.8 | 19.0 | 1.06 | 0.783 |
| <b>22</b> | TiO <sub>2</sub> | 15.4 | 18.9 | 1.04 | 0.789 |
| <b>23</b> | TiO <sub>2</sub> | 15.0 | 19.2 | 1.05 | 0.743 |
| <b>24</b> | TiO <sub>2</sub> | 15.8 | 19.1 | 1.05 | 0.784 |
